# Supplementary material for: Evolution of p‐coumaroylated lignin in eudicots provides new tools for cell wall engineering
Source: PubMed Central journal article supplement — New Phytol. 2022 Nov 10;237(1):251–64. doi: 10.1111/nph.18518 (PMC10099755; doi:10.1111/nph.18518), 2022-11-10
Supplement: NPH-237-251-s001.pdf [file NPH-237-251-s001.pdf]

Supporting Information:

**Evolution of *p*-coumaroylated lignin in eudicots provides new tools for cell wall engineering**

Yaseen Mottiar, Rebecca A. Smith, Steven D. Karlen, John Ralph, and Shawn D. Mansfield

Article Accepted: September 21, 2022

|                                                                                     |    |
|-------------------------------------------------------------------------------------|----|
| Table S1. RNA-seq analysis of candidate BAHDs expressed in kenaf stems .....        | 2  |
| Table S2. Primers and PCR conditions used in this study .....                       | 4  |
| Table S3. Structural polysaccharides in transgenic poplar .....                     | 6  |
| Figure S1. Incorporation of ester-linked pendent groups into lignin.....            | 7  |
| Figure S2. Nucleotide and amino acid sequences of <i>HcPMT</i> .....                | 9  |
| Figure S3. SDS-PAGE of recombinant <i>HcPMT</i> .....                               | 10 |
| Figure S4. Pairwise enzyme assays with 5 CoA donors and 3 monolignol acceptors..... | 11 |
| Figure S5. Expression of <i>HcPMT</i> in transgenic poplar .....                    | 13 |
| Figure S6. Microscopy of transgenic poplar stems.....                               | 14 |
| Figure S7. HPLC traces of alkaline hydrolysates from transgenic poplar .....        | 15 |
| Figure S8. NMR spectra of transgenic poplar lignin (aliphatics) .....               | 16 |
| Figure S9. Saccharification potential of transgenic poplar wood .....               | 17 |
| SI References .....                                                                 | 18 |

**Table S1.** RNA-seq analysis of putative homologues of monocot PMTs expressed in kenaf stems used to select candidate gene, shown in blue.

| Contig ID:   | RPKM:  | Total reads: | Closest Arabidopsis Homologue: | Corresponding Annotation:                                                                    | Additional Description:                                                                                                                                                                                                               |
|--------------|--------|--------------|--------------------------------|----------------------------------------------------------------------------------------------|---------------------------------------------------------------------------------------------------------------------------------------------------------------------------------------------------------------------------------------|
| contig_14943 | 4.27   | 2            | AT1G03010                      | None                                                                                         | Phototropic-responsive NPH3 family protein                                                                                                                                                                                            |
| contig_13644 | 0      | 0            | AT1G03390 (weak hit)           | None                                                                                         | HXXXD-type acyl-transferase family protein                                                                                                                                                                                            |
| contig_27028 | 3.46   | 2            | AT1G25580 (weak hit)           | Arabidopsis NAC domain containing protein 8, SUPPRESSOR OF GAMMA RADIATION 1 (ANAC008, SOG1) | Encodes suppressor of gamma response 1 (SOG1), a putative transcription factor governing multiple responses to DNA damage.                                                                                                            |
| contig_8764  | 12.23  | 8            | AT1G27620                      | None                                                                                         | HXXXD-type acyl-transferase family protein                                                                                                                                                                                            |
| contig_18803 | 7.1    | 3            | AT1G27620                      |                                                                                              |                                                                                                                                                                                                                                       |
|              | 19.33  | 11           |                                |                                                                                              |                                                                                                                                                                                                                                       |
| contig_1632  | 14.09  | 12           | AT1G28680                      | COUMARIN SYNTHASE (COSY)                                                                     | Catalyses trans-cis isomerization and lactonization in the biosynthesis of coumarins in roots.                                                                                                                                        |
| contig_16003 | 21.12  | 9            | AT1G53720 (weak hit)           | CYCLOPHILIN 59, cyclophilin 59 (CYP59, ATCYP59)                                              | Encodes a cyclophilin, member of a family modular proteins consisting of a peptidyl-prolyl cis- trans isomerase (PPIase) domain, followed by an RNA recognition motif (RRM), and a C-terminal domain enriched in charged amino acids. |
| contig_18932 | 4.73   | 2            | AT1G65450                      | GLAUCE (GLC)                                                                                 | Contains dual transcription units and alternative splicing that could rescue the sterility defect of glc mutants. Shares homology to BAHD (for BEAT, AHCT, HCBT, and DAT) acyl-transferases. Functions in double fertilization.       |
| contig_26826 | 9.81   | 5            | AT1G69990 (weak hit)           | BAK1-interacting receptor-like kinase 4 (BIR4)                                               | Leucine-rich repeat protein kinase family protein                                                                                                                                                                                     |
| contig_339   | 513.13 | 800          | AT2G25150 (weak hit)           | None                                                                                         | HXXXD-type acyl-transferase family protein                                                                                                                                                                                            |
| contig_14098 | 35.58  | 35           | AT2G37110                      | None                                                                                         | PLAC8 family protein                                                                                                                                                                                                                  |
| contig_25222 | 6.49   | 3            | AT2G40230                      | None                                                                                         | HXXXD-type acyl-transferase family protein                                                                                                                                                                                            |
| contig_9677  | 79.49  | 62           | AT3G03480 (weak hit)           | acetyl CoA:(Z)-3-hexen-1-ol acetyltransferase (CHAT)                                         | acetyl CoA:(Z)-3-hexen-1-ol acetyltransferase                                                                                                                                                                                         |
| contig_20086 | 6.78   | 3            | AT3G23840                      | CER26-LIKE (CER26-LIKE, AtPNP-R1)                                                            | HXXXD-type acyl-transferase family protein                                                                                                                                                                                            |
| contig_6580  | 11.89  | 8            | AT3G51150                      | None                                                                                         | ATP binding microtubule motor family protein                                                                                                                                                                                          |
| contig_17952 | 4.08   | 4            | AT3G62160                      | None                                                                                         | HXXXD-type acyl-transferase family protein                                                                                                                                                                                            |
| contig_16976 | 24.54  | 35           | AT4G08150                      | KNOTTED-like from Arabidopsis thaliana, BREVIPEDICELLUS 1 (KNAT1, BP1)                       | A member of class I knotted1-like homeobox gene family (together with KNAT2). Similar to the knotted1 (kn1) homeobox gene of maize.                                                                                                   |
| contig_6826  | 16.04  | 12           | AT4G15390                      | None                                                                                         | HXXXD-type acyl-transferase family protein                                                                                                                                                                                            |
| contig_17786 | 7.1    | 7            | AT4G22140                      | EARLY BOLTING IN SHORT DAYS (EBS)                                                            | Encoding a chromatin remodelling factor that regulates flowering time.                                                                                                                                                                |

Note: This table continues on the following page.

Note: Table continued from the preceding page.

| Contig ID:          | RPKM:         | Total reads: | Closest Arabidopsis Homologue: | Corresponding Annotation:                                                                                                                                             | Additional Description:                                                                                                                                                                                                                                                        |
|---------------------|---------------|--------------|--------------------------------|-----------------------------------------------------------------------------------------------------------------------------------------------------------------------|--------------------------------------------------------------------------------------------------------------------------------------------------------------------------------------------------------------------------------------------------------------------------------|
| contig_4757         | 100.62        | 79           | AT4G26000 (weak hit)           | PEPPER (PEP)                                                                                                                                                          | Encodes a novel Arabidopsis gene encoding a polypeptide with K-homology (KH) RNA-binding modules, which acts on vegetative growth and pistil development. Genetic studies suggest that PEP interacts with element(s) of the CLAVATA signaling pathway.                         |
| contig_22124        | 6.05          | 6            | AT5G25060 & AT5G10800          | reduced red-light responses in cry1cry2 background 1 (RRC1)                                                                                                           | RNA recognition motif (RRM)-containing protein                                                                                                                                                                                                                                 |
| contig_11413        | 11.48         | 3            | AT5G13230 (weak hit)           | None                                                                                                                                                                  | Tetratricopeptide repeat (TPR)-like superfamily protein                                                                                                                                                                                                                        |
| <b>contig_2673</b>  | <b>30.17</b>  | <b>24</b>    | <b>AT5G17540</b>               | <b>None</b>                                                                                                                                                           | <b>HXXXD-type acyl-transferase family protein</b>                                                                                                                                                                                                                              |
| <b>contig_10163</b> | <b>71.97</b>  | <b>29</b>    | <b>AT5G17540</b>               |                                                                                                                                                                       |                                                                                                                                                                                                                                                                                |
| <b>contig_10499</b> | <b>30.03</b>  | <b>27</b>    | <b>AT5G17540</b>               |                                                                                                                                                                       |                                                                                                                                                                                                                                                                                |
| <b>contig_10500</b> | <b>19.89</b>  | <b>11</b>    | <b>AT5G17540</b>               |                                                                                                                                                                       |                                                                                                                                                                                                                                                                                |
| <b>contig_10501</b> | <b>10.66</b>  | <b>4</b>     | <b>AT5G17540</b>               |                                                                                                                                                                       |                                                                                                                                                                                                                                                                                |
|                     | <b>162.72</b> | <b>95</b>    |                                |                                                                                                                                                                       |                                                                                                                                                                                                                                                                                |
| contig_4167         | 8.45          | 5            | AT5G22250                      | CCR4- associated factor 1b (AtCAF1b, CAF1b)                                                                                                                           | Encodes one of the homologs of the yeast CCR4-associated factor 1: AT3G44260 (CAF1a), AT5G22250 (CAF1b). Has mRNA deadenylation activity. Also plays a role in plant defense responses.                                                                                        |
| contig_22956        | 5.52          | 2            | AT5G25300 (weak hit)           | F-Box/DUF295 Brassicaceae-specific 36 (AtFDB36)                                                                                                                       | F-box protein                                                                                                                                                                                                                                                                  |
| contig_4656         | 14.94         | 17           | AT5G37930                      | None                                                                                                                                                                  | Protein with RING/U-box and TRAF-like domain                                                                                                                                                                                                                                   |
| contig_3391         | 11.8          | 10           | AT5G39670                      | CALMODULIN-LIKE 46 (CML46)                                                                                                                                            | Calmodulin like protein involved in negative regulation of pattern triggered immunity.                                                                                                                                                                                         |
| contig_21422        | 11.42         | 4            | AT5G41040                      | hydroxycinnamoyl- CoA:ω-hydroxyacid O-hydroxycinnamoyltransferase, aliphatic suberin feruloyl-transferase, REDUCED LEVELS OF WALL-BOUND PHENOLICS I (HHT, ASFT, RWPI) | Encodes a feruloyl-CoA transferase required for suberin synthesis. Has feruloyl-CoA-dependent feruloyl transferase activity towards substrates with a primary alcohol.                                                                                                         |
| contig_1217         | 387.6         | 515          | AT5G48930                      | hydroxycinnamoyl-CoA shikimate/quininate hydroxycinnamoyl transferase (HCT)                                                                                           | At5g48930 has been shown to encode for the hydroxycinnamoyl-Coenzyme A shikimate/quininate hydroxycinnamoyltransferase (HCT) both synthesizing and catabolizing the hydroxycinnamoylesters (coumaroyl/caffeoyl shikimate and quinate) involved in the phenylpropanoid pathway. |
| contig_1568         | 45.63         | 62           | AT5G48930                      |                                                                                                                                                                       |                                                                                                                                                                                                                                                                                |
| contig_2674         | 153.56        | 188          | AT5G48930                      |                                                                                                                                                                       |                                                                                                                                                                                                                                                                                |
| contig_8908         | 60.43         | 39           | AT5G48930                      |                                                                                                                                                                       |                                                                                                                                                                                                                                                                                |
| contig_18207        | 6.07          | 3            | AT5G48930                      |                                                                                                                                                                       |                                                                                                                                                                                                                                                                                |
|                     | 653.29        | 807          |                                |                                                                                                                                                                       |                                                                                                                                                                                                                                                                                |

**Table S2.** Primers and reaction conditions for construct assembly, transformant screening, and qRT-PCR.

| <b>Description:</b>                                                     | <b>Primer pair (5' → 3'):</b>                                                                                                                                                                           | <b>PCR reaction conditions:</b>                                                                                                                                                                                                                                                                                                                                                                                                                                                                                                                |
|-------------------------------------------------------------------------|---------------------------------------------------------------------------------------------------------------------------------------------------------------------------------------------------------|------------------------------------------------------------------------------------------------------------------------------------------------------------------------------------------------------------------------------------------------------------------------------------------------------------------------------------------------------------------------------------------------------------------------------------------------------------------------------------------------------------------------------------------------|
| Amplification of the synthetic <i>HcPMT</i> coding sequence (1335 bp)   | <p>Forward primer:<br/>ATG GCA CTG CTA CGA CCG</p> <p>Reverse primer:<br/>CTA AGC ACC AGT TGC TTC<br/>ATC</p>                                                                                           | <p>2.5 µL ..... 10× buffer<br/>0.5 µL ..... 50 mM MgSO<sub>4</sub><br/>0.5 µL ..... 10 µM forward primer<br/>0.5 µL ..... 10 µM reverse primer<br/>0.5 µL ..... 10 mM dNTPs mixture<br/>0.5 µL ..... template DNA*<br/>0.2 µL ..... <i>Pfx</i> DNA polymerase<br/>Up to 25 µL..... deionised water</p> <p>With thermal cycling as follows:<br/>94°C for 30 s, 34 cycles of (94°C for 15 s, 60°C for 30 s, 68°C for 90 s), and then 68°C for 10 min.</p> <p>* Note: template DNA was the synthetic <i>HcPMT</i> coding sequence.</p>            |
| Addition of the <i>attB</i> adaptor sequences to enable Gateway cloning | <p>Forward primer:<br/>GGG GAC AAG TTT GTA CAA<br/>AAA AGC AGG CTA TGG CAC<br/>TGC TAC GAC CG</p> <p>Reverse primer:<br/>GGG GAC CAC TTT GTA CAA<br/>GAA AGC TGG GTC TAA GCA<br/>CCA GTT GCT TCA TC</p> | <p>2.5 µL ..... 10× buffer<br/>0.5 µL ..... 50 mM MgSO<sub>4</sub><br/>0.5 µL ..... 10 µM forward primer<br/>0.5 µL ..... 10 µM reverse primer<br/>0.5 µL ..... 10 mM dNTPs mixture<br/>0.5 µL ..... template DNA*<br/>0.2 µL ..... <i>Pfx</i> DNA polymerase<br/>Up to 25 µL..... deionised water</p> <p>With thermal cycling as follows:<br/>94°C for 30 s, 34 cycles of (94°C for 15 s, 60°C for 30 s, 68°C for 90 s), and then 68°C for 10 min.</p> <p>* Note: template DNA was a plasmid containing the <i>HcPMT</i> coding sequence.</p> |
| PCR-screening to identify positive transformants                        | <p>Forward primer:<br/>CTG ACC GCA TGT GTT TGG</p> <p>Reverse primer:<br/>CTA AGC ACC AGT TGC TTC<br/>ATC</p> <p>Amplicon size: 543 bp</p>                                                              | <p>2.5 µL ..... 10× buffer<br/>0.5 µL ..... 50 mM MgSO<sub>4</sub><br/>0.5 µL ..... 10 µM forward primer<br/>0.5 µL ..... 10 µM reverse primer<br/>0.5 µL ..... 10 mM dNTPs mixture<br/>0.5 µL ..... template DNA<br/>0.5 µL ..... <i>Taq</i> DNA polymerase<br/>Up to 25 µL..... deionised water</p> <p>With thermal cycling as follows:<br/>94°C for 3 min, 34 cycles of (94°C for 30 s, 55°C for 30 s, 72°C for 30 s), and then 72°C for 5 min.</p> <p>* Note: template DNA was genomic DNA preparations from young poplar leaves.</p>      |

Note: This table continues on the following page.

Note: Table continued from the preceding page.

| Description:                                      | Primer pair (5' → 3'):                                                                                                            | PCR reaction conditions:                                                                                                                                                                                                                                                                                     |
|---------------------------------------------------|-----------------------------------------------------------------------------------------------------------------------------------|--------------------------------------------------------------------------------------------------------------------------------------------------------------------------------------------------------------------------------------------------------------------------------------------------------------|
| Quantification of expression levels using RT-qPCR | For <i>HcPMT</i> transgene,<br>Forward primer:<br>GCC TGC AAG CGT TAT GGA AA<br><br>Reverse primer:<br>GCT TCA TCA TCT GCC AGG GT | 5 µL ....BrightGreen qPCR master mix<br>0.3 µL ..... 10 µM forward primer<br>0.3 µL ..... 10 µM reverse primer<br>1 µL ..... template cDNA<br>Up to 10 µL..... deionised water                                                                                                                               |
|                                                   | Amplicon size: 63 bp                                                                                                              | With qPCR parameters as follows:<br>95°C for 30 s, 39 cycles of (95°C for 5 s, 60°C for 15 s, plate read for fluorescence), and then followed by a melt-curve analysis as follows:<br>95°C for 10 s, ramp from 55°C to 95°C at 0.5°C per increment with hold times of 5 s and a plate read for fluorescence. |
|                                                   | For elongation factor 1β (reference),<br>Forward primer:<br>GGC ATT AAG TTT TGT CGG<br>TCT G                                      | * Note: template DNA was cDNA preparations synthesised with RNA extracted from developing poplar xylem.                                                                                                                                                                                                      |
|                                                   | Reverse primer:<br>GCG GTT CAT CAT TTC ATC<br>TGG                                                                                 |                                                                                                                                                                                                                                                                                                              |
|                                                   | Amplicon size: 97 bp                                                                                                              |                                                                                                                                                                                                                                                                                                              |
|                                                   | For actin (reference),<br>Forward primer:<br>ACC AGT GTG TCT TGG TCT<br>ACC C                                                     |                                                                                                                                                                                                                                                                                                              |
|                                                   | Reverse primer:<br>CGA TGC CGA GGA TAT TCA AC                                                                                     |                                                                                                                                                                                                                                                                                                              |
|                                                   | Amplicon size: 127 bp                                                                                                             |                                                                                                                                                                                                                                                                                                              |

**Table S3.** Composition of structural polysaccharides (neutral sugars) in transgenic poplars expressing *HcPMT*. The values shown in bold are significantly different from the wild-type (WT) control (one-way ANOVA with post-hoc Dunnett's test,  $n=5$  for each line,  $p$ -value < 0.05). Mean values are provided along with standard deviation.

| Sugar (% w/w) | Line 1              | Line 2       | Line 3             | Line 4       | Line 5             | WT           |
|---------------|---------------------|--------------|--------------------|--------------|--------------------|--------------|
| Glucose       | <b>41.25 ± 3.13</b> | 44.30 ± 2.97 | 44.30 ± 0.90       | 44.62 ± 0.93 | 46.60 ± 3.41       | 45.21 ± 0.79 |
| Xylose        | 15.76 ± 3.53        | 17.78 ± 0.65 | 18.26 ± 0.30       | 18.18 ± 0.22 | 18.23 ± 0.34       | 17.64 ± 0.30 |
| Mannose       | 1.45 ± 0.19         | 1.67 ± 0.16  | 1.60 ± 0.09        | 1.58 ± 0.06  | <b>1.80 ± 0.08</b> | 1.57 ± 0.10  |
| Galactose     | 0.79 ± 0.05         | 0.74 ± 0.02  | 0.75 ± 0.05        | 0.74 ± 0.07  | 0.70 ± 0.09        | 0.77 ± 0.08  |
| Rhamnose      | 0.44 ± 0.02         | 0.44 ± 0.01  | <b>0.46 ± 0.01</b> | 0.43 ± 0.02  | 0.43 ± 0.01        | 0.43 ± 0.01  |
| Arabinose     | 0.38 ± 0.03         | 0.33 ± 0.01  | 0.36 ± 0.04        | 0.35 ± 0.02  | <b>0.27 ± 0.03</b> | 0.34 ± 0.02  |

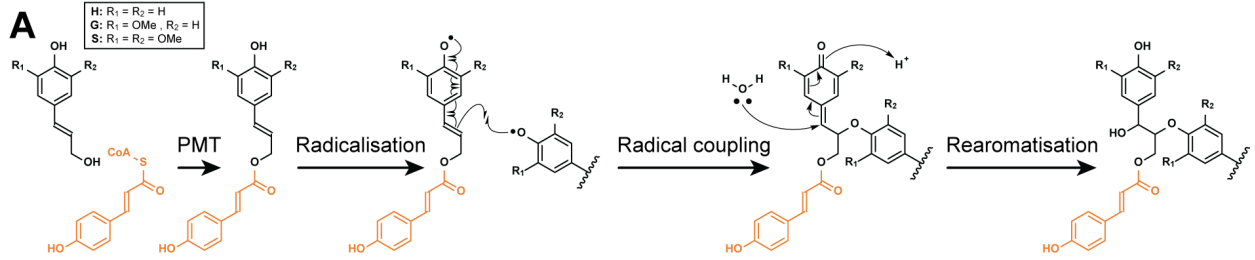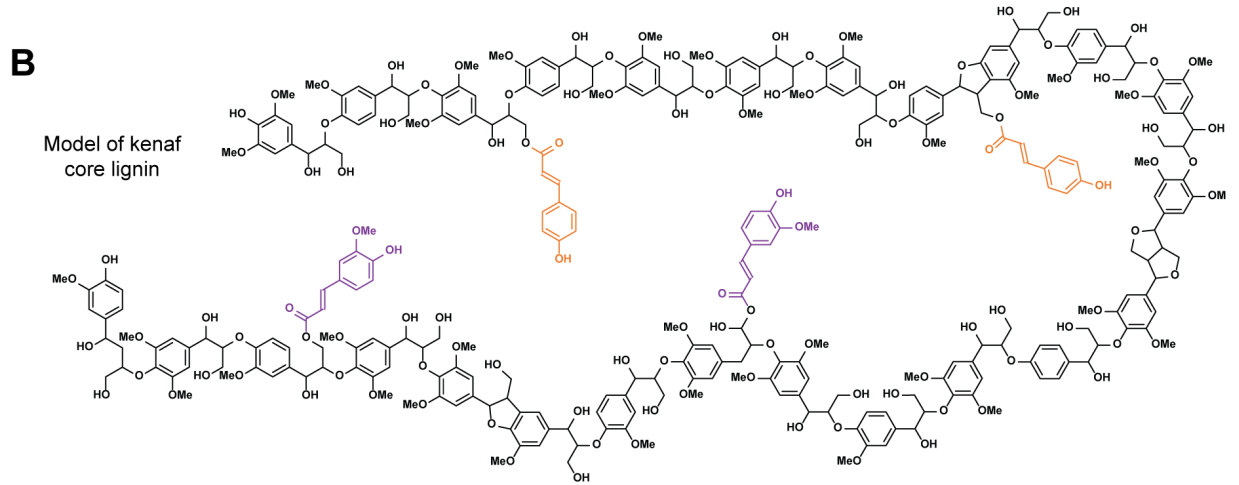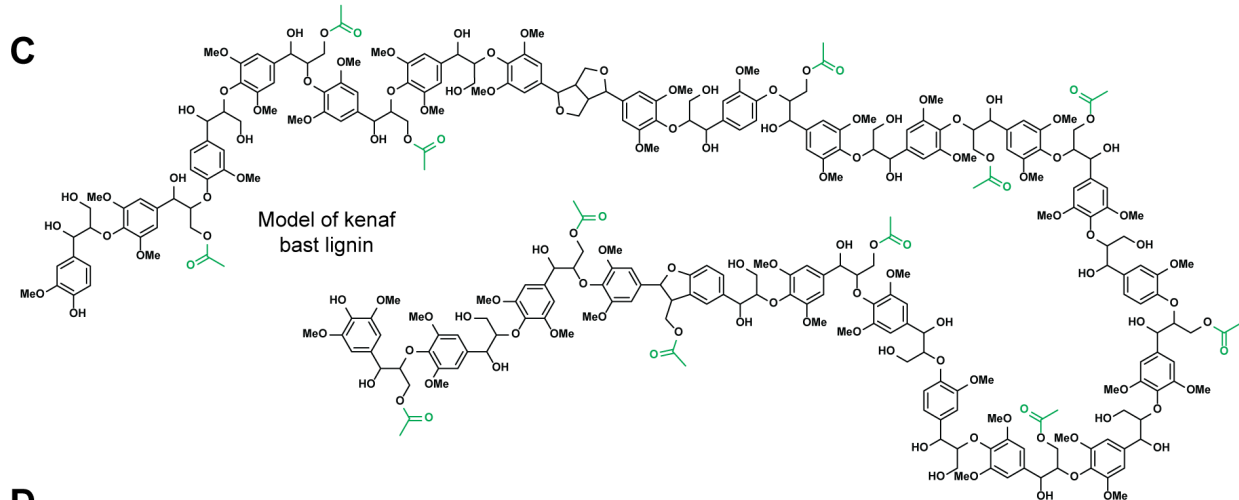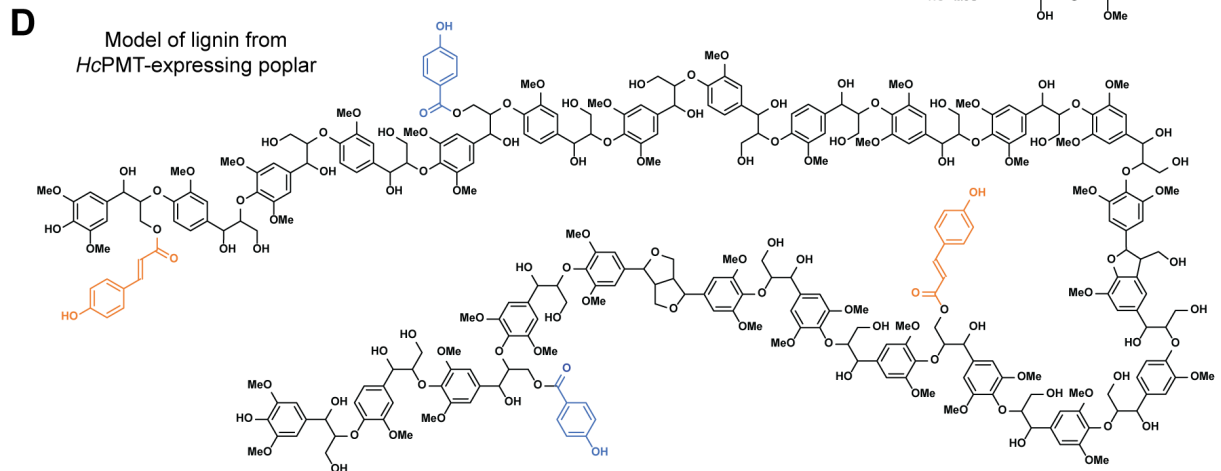

**Figure S1.** Incorporation of ester-linked pendent groups into lignin. **A.** Conjugates formed by *p*-coumaroyl-CoA:monolignol transferase (PMT) enzymes can participate in radical coupling and lignification, as shown. **B.** A hypothetical model of lignin from kenaf core tissues depicting *p*-coumarate groups in orange and ferulate groups in magenta. **C.** A hypothetical model of lignin from kenaf bast fibres depicting acetate groups in green. **D.** A hypothetical model of lignin from transgenic poplar expressing *HcPMT* depicting novel *p*-coumarate groups in orange, and native *p*-hydroxybenzoate groups in blue.



>HcPMT\_cds\_reported\_in\_Zhang\_et\_al\_2020

```
ATGGCACTGCTACGACCCGCTTCATTAGTGTTCACTGTACGGAGGCATGATCCGGAGCTTGTCGTCCCGTCTAAACC
AACCCCTCACGAGTGTAAGACGCTGTCCGACATCGACGACCAAGACGGTCATCGTTTTCAAATCCGAGGGCTCCATG
TTTACCGGTGCAACGCTAGCATGCAAGGAAAGGATCCCGTTAGGGTTATAAGAGAAGCACTTGCTAAAGCCCTAGTG
TTTTATTATCCATTTGCTGGTAGAATAAAGGAAGGGCCGAACCGGAAGCTTATGGTGGATTGTAAGGGGAAGGTGT
GTTGTTTTATCGAGGCCGATGCTGATGTTATGCTCGAGGAATTTGGTGGTTCACCTTCATCCTCCATTTCCATGTTTCA
AGGATCTTCTTTGTGAGCCCACTGGCTCAAATGATTTGTTAAACTCTCCGGTGCTACAAATTCAGGTGACACGCTTG
AAATGTGGCGGTTTCATCTTTGCGCACCGATTCAACCACACCATGAGCGACGCTGTCCGGGCTGATTCAATTCATGTC
TGCGATGGGCGAAATAGCACGAGGTGCAGTGGCTCCCTCAATCCCACCCGTTTGGGAAAGACATCTTTTGAATGCTC
GAGACCCGCCGCTCATAACATGCGAGCACACAGTACGACCATGCCACGGCCACCAACGGTACAATCATGCCACACA
GACAACCTGGTTACCACCTCTTTCTTCTTCGGGCCAACTCAAATTTAGCTCTTAAAAGACTCATCTCCGATAATGT
CAGTTGTTCAACGTTTCGATATCTTAACCGCATGCGTGTGGCGCTGTGTCGATAGCCATGAAACTCGCCCCGACG
AAGACGTTCCGGCTCATATGCATAGTCAATGCAAGGTACAAATTCAACCCTCCTTTGCCATTAGGGTATTACGGGAAT
GCACTCGGATACCCCGCGGCTCTAACAACCGCAGGCGAACTTAGCAAAAAACCATTAGAATACGCAGTAAAGCTAGT
GAAGGAGGCCAAGGCAAAGGCTACAGACGAGTACATGAAATCGACGGCGGATTTGATGGTGGTTCGAGGACGGCCAA
ACGTTAACACGGTTCGATCTTTTCTGGTGTCCGATTTGAGTCCGGCCAGGTTCCAGGGAGGTTGACTTTGGGTGGGGT
AAGGCAGAGTTTGGTGGACCGTCAATGGTACAGAGATTATAAGCTTTTATATACCTTCAAAGAATAAGGAAGGAAA
GGAAGGGATTGCAGTGCCGGTTTGCTTGCTGCATCTGTTATGGAGAGCTTTGTTAAAGAGATTAATTCACGCTGG
CAGACGATGAAGCAACTGGTGCTTAG
```

>HcPMT\_amino\_acid\_sequence

```
MALLRPASLVFTVRRHDPELVVPSKPTPHECKTSLSDIDDQDGHFRFQIRGLHVYRCNASMQGKDPVVRVIREALAKALV
FYYPFAGRIKEGPNRKLMDVCTGEGVLFIEADADVMLEEFGGSLHPPFPCFKDLLCEPTGSNDLLNSPVLQIQVTRL
KCGGFIFAHRFNHTMSDAVGLIQFMSAMGEIARGAVAPSI PPVWERHLLNARDPPLITCEHHEYDHATATNGTIMPT
DNLVHHSFFFQPTQISALKRLISDNVSCSTFDILTACVWRCRTIAMKLGPEDEVRLICIVNARYKFNPLPLGYGN
ALGYPAALTTAGELSKKPLEYAVKLVKEAKAKATDEYMKSTADLMVSRGRPNVNTVRSFLVSDLSRARFREVDFGWG
KAEFGGPSNGTEIISFYIIPSKNKEGKEGIAVPVCLPASVMESFVKEINSTLADDEATGA
```

**Figure S2.** Nucleotide and amino acid sequences of *HcPMT*.

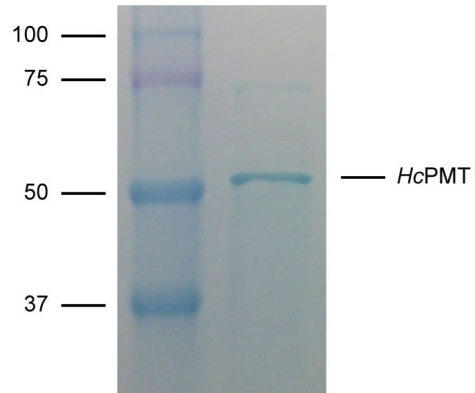

**Figure S3.** Coomassie-stained SDS-PAGE gel. Recombinant *HcPMT* enzyme was purified from *E. coli* by immobilised metal affinity chromatography. The sizes of molecular weight standards (Precision-Plus Dual Colour Standards, Bio-Rad Labs) are labelled on the left in kDa.

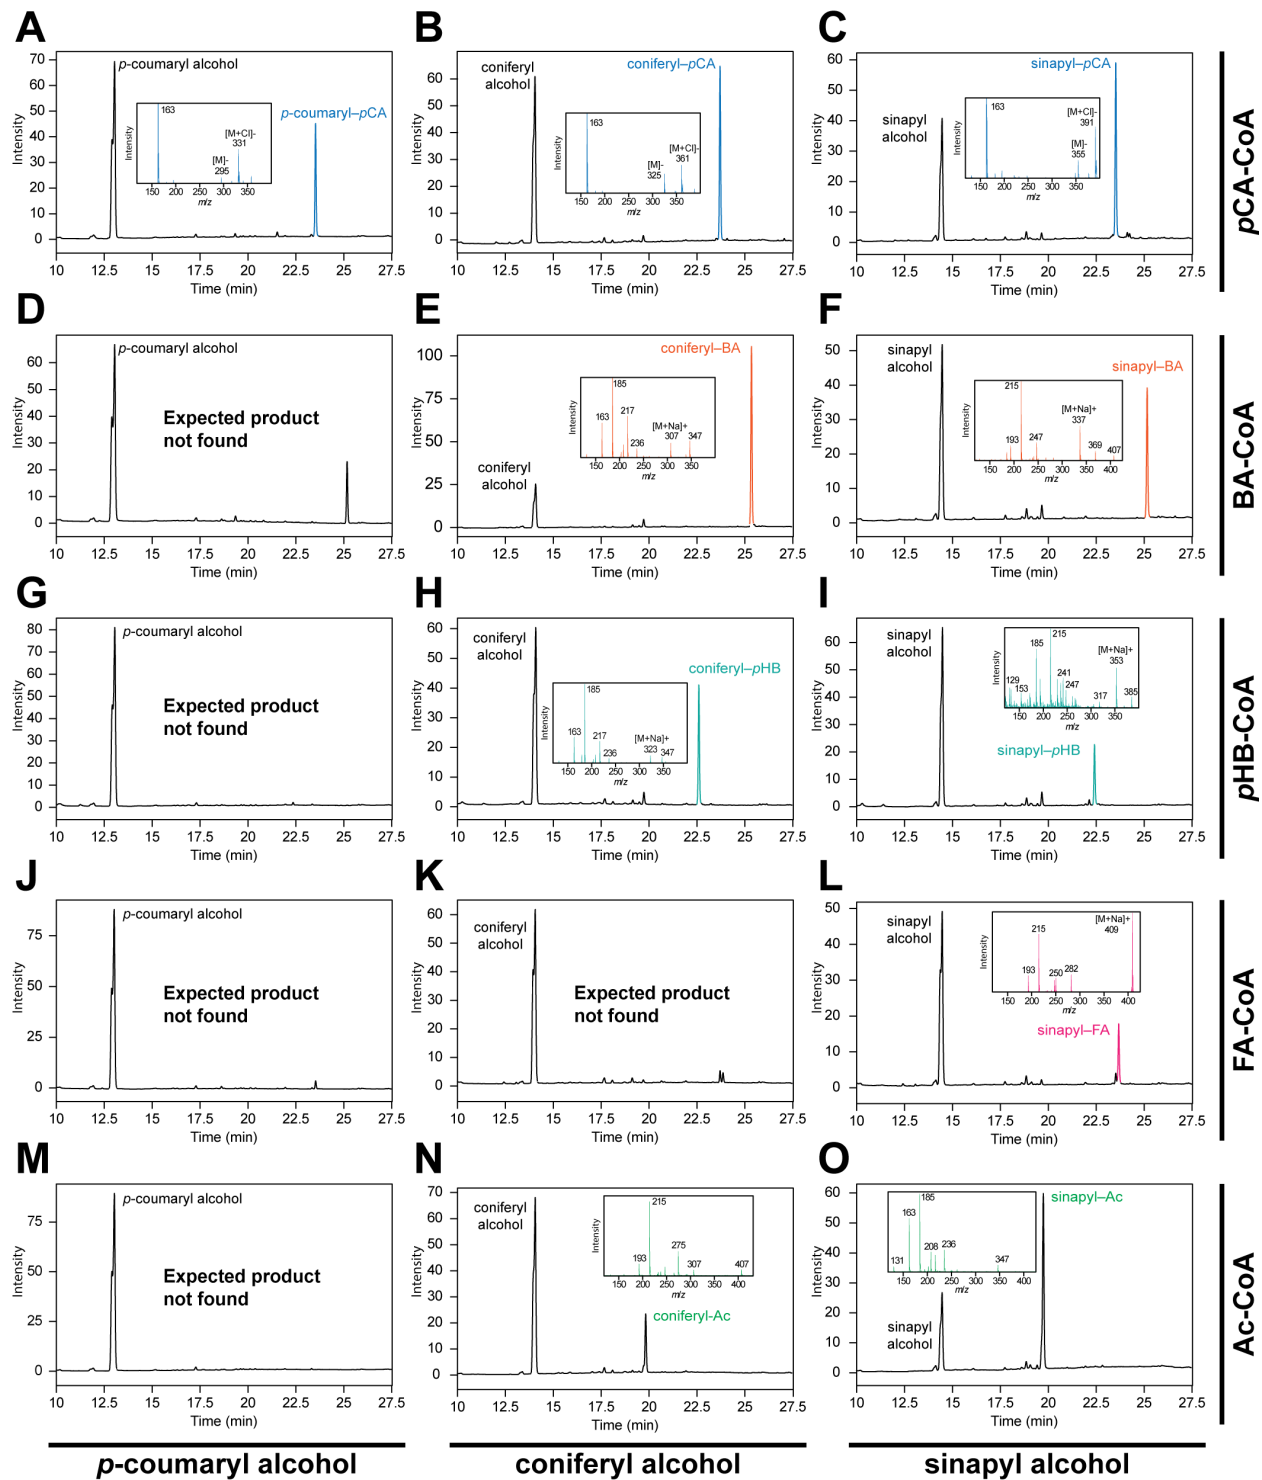

**Figure S4.** Pairwise assays to screen *HcPMT* enzyme activity. **A-C.** Assays of *pCA*-CoA with the three monolignols produced *p*-coumaryl-*pCA*, coniferyl-*pCA*, and sinapyl-*pCA*. **D-F.** Assays with BA-CoA yielded coniferyl-BA and sinapyl-BA. **G-I.** Assays with *pHB*-CoA yielded coniferyl-*pHB* and sinapyl-*pHB*. **J-L.** Assays with FA-CoA yielded only sinapyl-FA. **M-O.** Assays with Ac-CoA yielded coniferyl-Ac and sinapyl-Ac. Chromatographic traces show the absorbance at 273 nm. Insets show mass fragmentation patterns for monolignol conjugates, which were validated using authentic standards. All reactions were performed at room temperature for 60 min with 1  $\mu$ g purified enzyme, 1 mM dithiothreitol, 1 mM of each CoA thioester, and 1 mM of each monolignol in 50 mM phosphate buffer (pH 6).

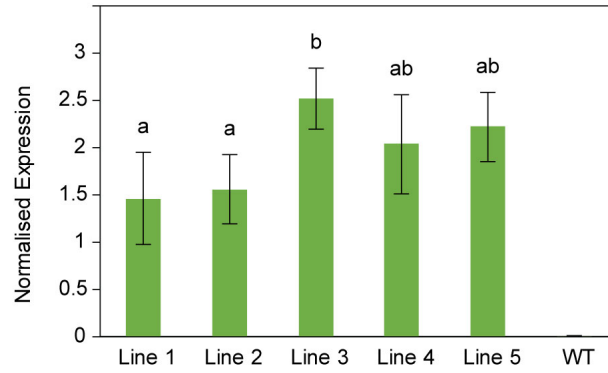

**Figure S5.** Transgene expression in transgenic poplar expressing *HcPMT*. Relative expression of *HcPMT*, shown in green, was measured by qRT-PCR. No expression was detected for the wild-type (WT) control. Expression was normalised relative to the poplar actin and elongation factor 1 $\beta$  sequences. Five biological replicates were analysed for each line using technical triplicates. The letters above each bar indicate statistically significant differences between the transgenic lines (one-way ANOVA with Tukey-Kramer test,  $\alpha < 0.05$ ). Error bars represent standard deviation.

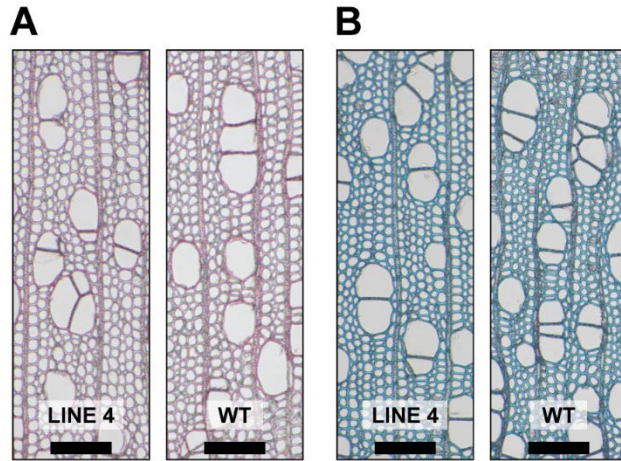

**Figure S6.** Light microscopy of representative polar stems. **A.** Transverse stem cross-sections of transgenic poplar expressing *HcPMT* (line 4) and the wild-type (WT) control, as labelled, stained with phloroglucinol-HCl. **B.** The same, except stained with toluidine blue. The black scale bars represent 100  $\mu\text{m}$ .

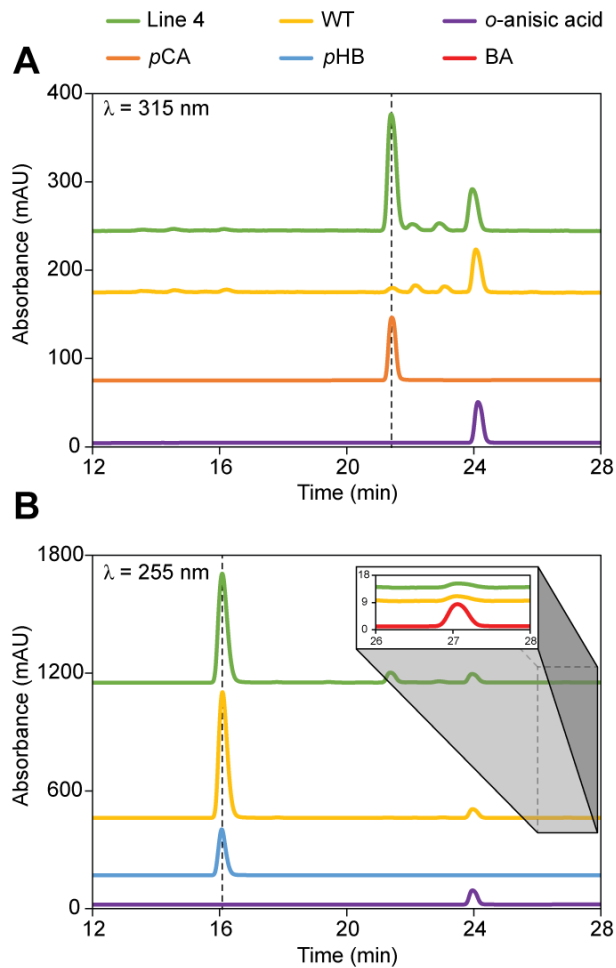

**Figure S7.** Analysis of cell-wall-bound phenolics in transgenic poplar expressing *HcPMT* by high-performance liquid chromatography. **A.** Alkaline hydrolysates of extractive-free wood released substantial amounts of *p*-coumarate (*p*CA) from line 4 (green) and only trace amounts from the wild-type (WT) control (yellow). Detection was performed at 315 nm, the  $\lambda_{\text{max}}$  for *p*CA. **B.** The same as in A, but with detection at 255 nm, the  $\lambda_{\text{max}}$  for *p*-hydroxybenzoate (*p*HB), showing the slight decrease in *p*HB released from line 4 relative to the WT control. Vertical dashed lines mark the peaks corresponding to *p*CA, in **A**, and *p*HB, in **B**. The shaded inset in **B** provides a zoomed-in view of 26–28 min and shows that only trace amounts of benzoate (BA) were detected. Chromatograms are also presented for authentic *p*CA (orange), *p*HB (blue), BA (red), as well as *o*-anisic acid (purple) which was used as an internal standard.

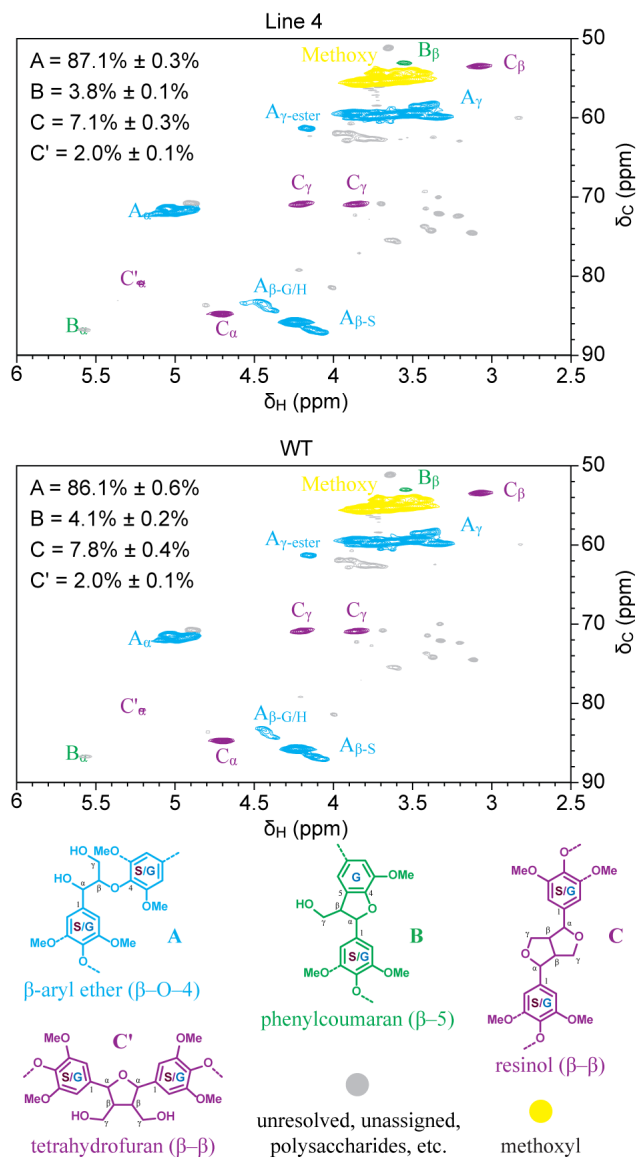

**Figure S8.** Additional NMR spectra of transgenic poplar expressing *HcPMT*. Two-dimensional  $^1\text{H}$ - $^{13}\text{C}$  HSQC NMR spectra for enzyme-lignin samples of line 4 and the wild-type (WT) control, as labelled, showing the aliphatics region. The colour-coding and peak annotations are elaborated with the structures shown below for  $\beta$ -aryl ether (A, cyan), phenylcoumaran (B, green), resinol (C, magenta), and tetrahydrofuran units (C', magenta). Proportions for integrated peak volumes are provided as the mean  $\pm$  standard error for three biological replicates.



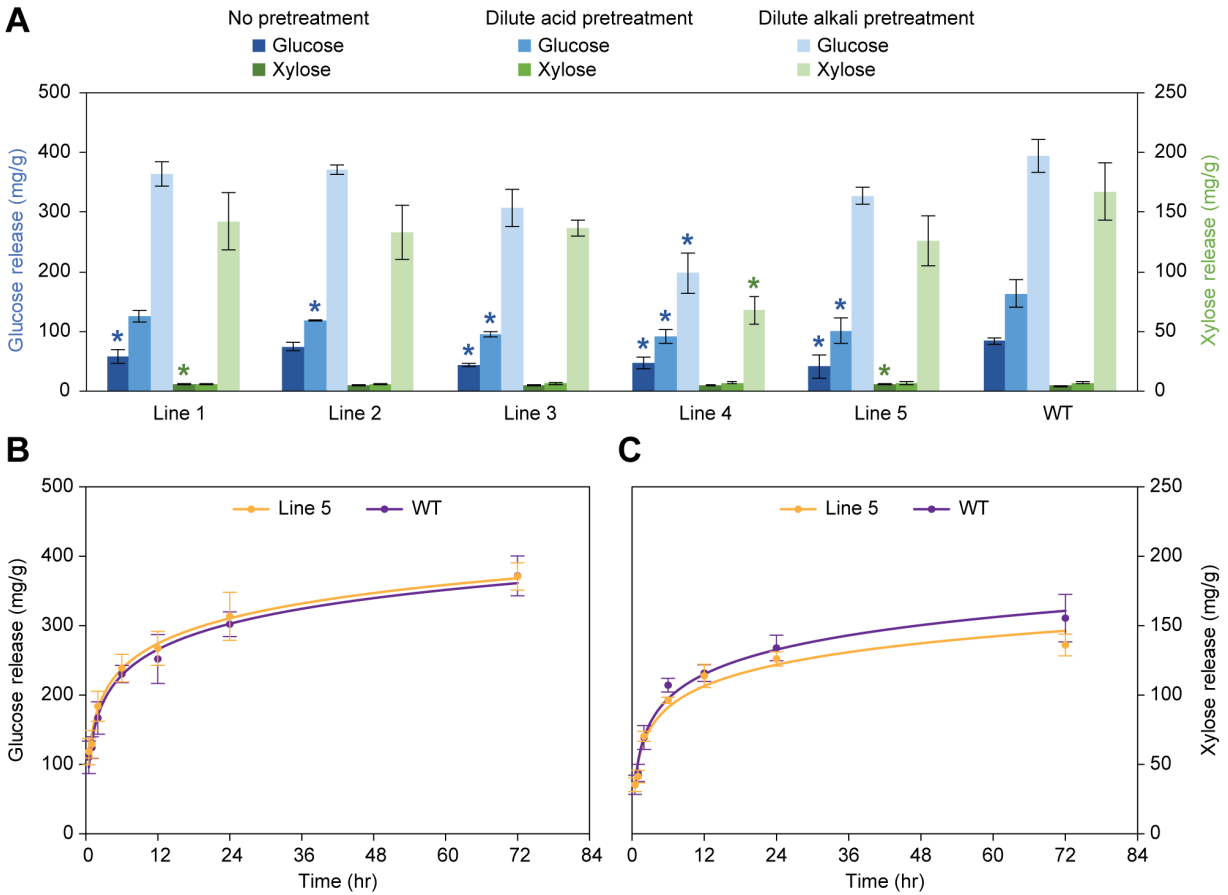

**Figure S9.** Saccharification potential of transgenic poplar expressing *HcPMT*. **A.** The release of glucose (shades of blue) and xylose (shades of green) is shown following various pretreatments (dilute alkali, dilute acid, and no pretreatment, as labelled) and a 72-h enzymatic hydrolysis. Those values marked with an asterisk are significantly different from the wild-type (WT) control (one-way ANOVA with Dunnett's test,  $n=3$  for each line,  $p$ -value  $< 0.05$ ). Error bars represent standard deviation. **B.** Enzymatic hydrolysis time course showing the release of glucose for line 5 (orange) and the WT control (magenta) following dilute alkali pretreatment. **C.** The same as **B**, but showing xylose release. For **A–C**, the error bars show standard deviation for three biological replicates, each measured in triplicate.

## SI References

Zhang L, Xu Y, Zhang X, Ma X, Zhang L, Liao Z, Zhang Q, Wan X, Cheng Y, Zhang J, Li D, Zhang L, Xu J, Tao A, Lin L, Fang P, Chen S, Qi R, Xu X, Qi J, Ming R. 2020. The genome of kenaf (*Hibiscus cannabinus* L.) provides insights into bast fibre and leaf shape biogenesis. *Plant Biotech. J.* 18(8): 1796–1809.
